# Supplementary material for: Enhancing the genome editing toolbox: genome wide CRISPR arrayed libraries
Source: PubMed Central journal article supplement (PMC5440395; doi:10.1038/s41598-017-01766-5), 2017-05-22
Supplement: 41598_2017_1766_MOESM1_ESM.pdf [file 41598_2017_1766_MOESM1_ESM.pdf]

## Enhancing the genome editing toolbox: genome wide CRISPR arrayed libraries

Emmanouil Metzakopian<sup>1</sup>, Alex Strong<sup>1</sup>, Vivek Iyer<sup>1</sup>, Alex Hodgkins<sup>1</sup>, Konstantinos Tzelepis<sup>1</sup>, Liliana Antunes<sup>1</sup>, Mathias Friedrich<sup>1</sup>, Qiaohua Kang<sup>2</sup>, Teresa Davidson<sup>2</sup>, Jacob Lamberth<sup>2</sup>, Christina Hoffmann<sup>2</sup>, Gregory D. Davis<sup>2</sup>, George S. Vassiliou<sup>1</sup>, William C. Skarnes<sup>1</sup>, Allan Bradley<sup>1\*</sup>.

1. Wellcome Trust Sanger Institute, Wellcome Trust Genome Campus, Hinxton, Cambridge CB10 1SA, UK.
2. MilliporeSigma, St. Louis, Missouri, 2909 Laclede Ave

\* Correspondence should be addressed to: A.B (abradley@sanger.ac.uk)

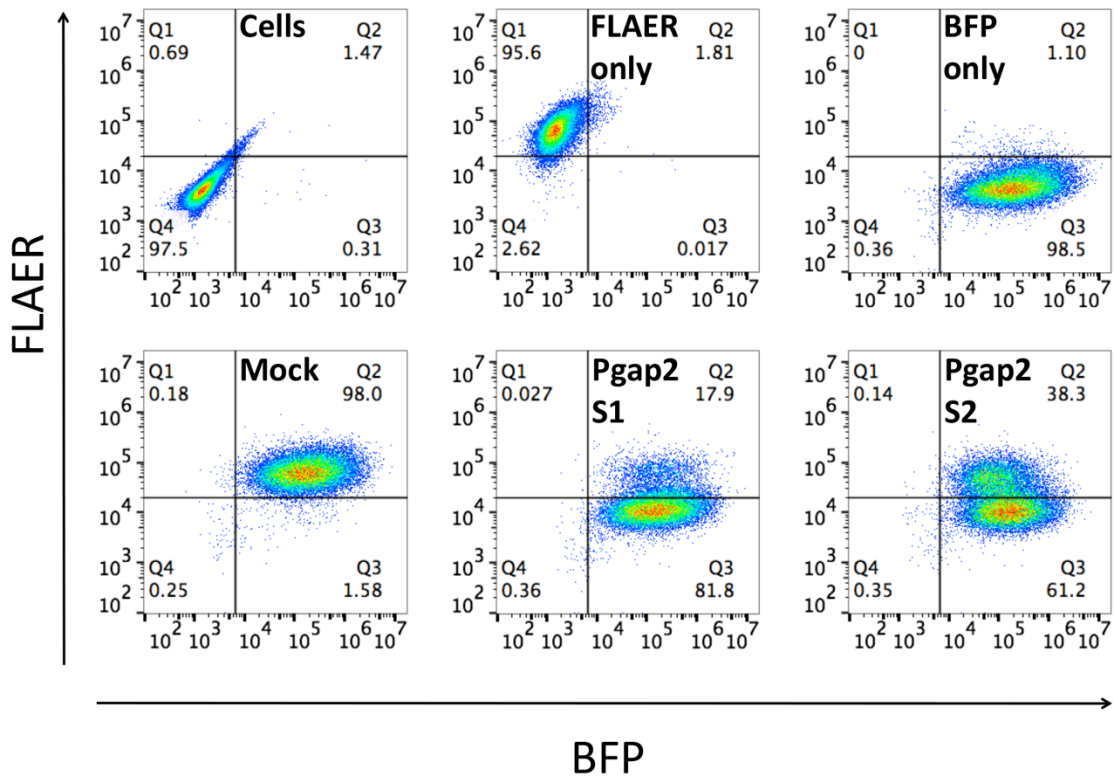

**Supplementary Figure 1.** Flow cytometry analysis of FLAER stained cells using mouse ES cells transfected with sgRNAs against Pgap2 gene targeting site 1 and site 2. The sgRNA expressing cells were selected with puromycin from 24 hours post transfection throughout the cell culture term. Cells were analysed 7 days post transfection. Mock experiment was performed with non-targeting sgRNA. Cells: untransfected and unstained cells. FLAER only: untransfected and FLAER stained cells. BFP only: transfected cells with a non-targeting sgRNA construct and unstained. Mock: transfected cells with a non targeting sgRNA construct and FLAER stained. Pgap2 S1 and S2: transfected cells with sgRNAs targeting site 1 and site 2 of the Pgap2 gene and FLAER stained.
